# Supplementary material
Source: publisher site journal article supplement (https://www.dovepress.com/article/448980)

**Supplemental Material**

**Risk of arterial and venous thrombotic events among patients with COVID-19: A multi-national collaboration of regulatory agencies from Canada, Europe, and United States**

Vincent Lo Re III; Noelle M. Cocoros;Rebecca A. Hubbard; Sarah K. Dutcher;Craig W. Newcomb; John G. Connolly; Silvia Perez-Vilar; Dena M. Carbonari;Maria E. Kempner; José J. Hernández-Muñoz; Andrew B. Petrone; Allyson M. Pishko; Meighan Rogers Driscoll; James T. Brash; Sean Burnett; Catherine Cohet; Matthew Dahl; Terese A. DeFor; Antonella Delmestri; Djeneba Audrey Djibo; Talita Duarte-Salles; Laura B. Harrington; Melissa Kampman; Jennifer L. Kuntz; Xavier Kurz; Núria Mercadé Besora; Pamala A. Pawloski; Peter R. Reijnbeek; Sarah Seager; Claudia A. Steiner; Katia Verhamme; Fangyun Wu; Yunping Zhou; Edward Burn; J. Michael Paterson; Daniel Prieto-Alhambra

**Table of Contents**

Supplemental Table 1 ....................................................................................................................... 2

Supplemental Table 2 ....................................................................................................................... 5

Supplemental Table 3 ....................................................................................................................... 8

Supplemental Table 4 ....................................................................................................................... 10

Supplemental Table 5 ....................................................................................................................... 13

Supplemental Table 6 ....................................................................................................................... 14

Supplemental Table 7 ....................................................................................................................... 16

Supplemental Table 8 ....................................................................................................................... 19

Supplemental Figure 1 ...................................................................................................................... 20

**Supplemental Table 1.** 90-day absolute risk (%) with 95% confidence intervals of arterial and venous thromboembolism events among ambulatory-diagnosed patients with COVID-19 prior to and during COVID-19 vaccine availability, by country

**Panel A**

| **Characteristic** | **Canadaa** | | **Englandb** | | **Germanyc** | | **Italyd** | |
| --- | --- | --- | --- | --- | --- | --- | --- | --- |
| **Pre-Vaccine Availability** | **Post-Vaccine Availability** | **Pre-Vaccine Availability** | **Post-Vaccine Availability** | **Pre-Vaccine Availability** | **Post-Vaccine Availability** | **Pre-Vaccine Availability** | **Post-Vaccine Availability** |
| **Arterial Thromboembolism** | | |  |  |  |  |  |  |
| **Age** |  |  |  |  |  |  |  |  |
| 18-44 years | --e | 0.01 (0.01, 0.01) | 0.03 (0.02, 0.04) | 0.00 (0.00, 0.01) | 0.14 (0.11, 0.17) | 0.11 (0.09, 0.12) | --e | 0.06 (0.03, 0.09) |
| 45-54 years | --e | 0.07 (0.06, 0.09) | 0.16 (0.12, 0.21) | 0.04 (0.03, 0.05) | 0.30 (0.24, 0.38) | 0.26 (0.23, 0.29) | 0.36 (0.20, 0.59) | 0.20 (0.14, 0.28) |
| 55-64 years | 0.13 (0.09, 0.20) | 0.17 (0.15, 0.20) | 0.35 (0.28, 0.43) | 0.13 (0.11, 0.15) | 0.47 (0.39, 0.57) | 0.36 (0.32, 0.39) | 0.34 (0.18, 0.58) | 0.31 (0.23, 0.41) |
| 65-74 years | 0.37 (0.25, 0.52) | 0.39 (0.34, 0.46) | 0.78 (0.65, 0.93) | 0.28 (0.24, 0.32) | 0.69 (0.53, 0.89) | 0.70 (0.62, 0.78) | 1.19 (0.78, 1.74) | 0.72 (0.56, 0.91) |
| 75-84 years | 0.58 (0.41, 0.81) | 0.81 (0.69, 0.95) | 0.97 (0.80, 1.16) | 0.37 (0.31, 0.44) | 1.31 (1.04, 1.63) | 0.94 (0.83, 1.06) | 1.84 (1.21, 2.66) | 1.36 (1.09, 1.68) |
| ≥85 years | 0.37 (0.25, 0.54) | 0.69 (0.54, 0.85) | 0.93 (0.73, 1.16) | 0.65 (0.53, 0.78) | 1.42 (1.04, 1.90) | 0.96 (0.81, 1.14) | 1.59 (0.85, 2.71) | 1.91 (1.44, 2.49) |
| **Sex** |  |  |  |  |  |  |  |  |
| Male | 0.14 (0.12, 0.18) | 0.13 (0.12, 0.14) | 0.46 (0.41, 0.51) | 0.09 (0.08, 0.10) | 0.33 (0.29, 0.38) | 0.29 (0.27, 0.31) | 0.61 (0.45, 0.80) | 0.31 (0.25, 0.37) |
| Female | 0.08 (0.06, 0.11) | 0.07 (0.06, 0.08) | 0.18 (0.15, 0.21) | 0.04 (0.04, 0.05) | 0.36 (0.32, 0.41) | 0.29 (0.27, 0.31) | 0.44 (0.32, 0.58) | 0.40 (0.34, 0.46) |
| **Venous Thromboembolism** | | |  |  |  |  |  |  |
| **Age** |  |  |  |  |  |  |  |  |
| 18-44 years | 0.06 (0.04, 0.08) | 0.11 (0.10, 0.12) | 0.26 (0.22, 0.30) | 0.09 (0.08, 0.10) | 0.03 (0.02, 0.05) | 0.03 (0.02, 0.04) | --e | 0.04 (0.02, 0.07) |
| 45-54 years | 0.22 (0.16, 0.29) | 0.34 (0.31, 0.38) | 0.71 (0.62, 0.81) | 0.22 (0.20, 0.24) | 0.22 (0.17, 0.29) | 0.19 (0.17, 0.22) | 0.43 (0.26, 0.68) | 0.32 (0.24, 0.41) |
| 55-64 years | 0.41 (0.32, 0.51) | 0.54 (0.50, 0.59) | 1.12 (1.00, 1.25) | 0.44 (0.41, 0.48) | 0.45 (0.36, 0.54) | 0.41 (0.37, 0.45) | 0.60 (0.38, 0.90) | 0.78 (0.65, 0.93) |
| 65-74 years | 0.67 (0.51, 0.86) | 0.86 (0.78, 0.95) | 1.97 (1.76, 2.20) | 0.80 (0.74, 0.87) | 0.83 (0.65, 1.05) | 0.82 (0.74, 0.91) | 1.78 (1.27, 2.43) | 1.39 (1.16, 1.65) |
| 75-84 years | 0.68 (0.49, 0.93) | 1.06 (0.92, 1.23) | 2.04 (1.79, 2.32) | 1.12 (1.01, 1.23) | 1.35 (1.07, 1.67) | 1.20 (1.08, 1.34) | 2.04 (1.38, 2.90) | 1.90 (1.57, 2.26) |
| ≥85 years | 0.35 (0.23, 0.51) | 0.67 (0.53, 0.83) | 1.35 (1.11, 1.62) | 1.19 (1.03, 1.38) | 1.86 (1.42, 2.40) | 1.47 (1.28, 1.68) | 1.84 (1.03, 3.01) | 2.16 (1.66, 2.77) |
| **Sex** |  |  |  |  |  |  |  |  |
| Male | 0.30 (0.25, 0.34) | 0.37 (0.35, 0.39) | 1.14 (1.06, 1.22) | 0.31 (0.29, 0.32) | 0.39 (0.34, 0.44) | 0.39 (0.37, 0.42) | 1.10 (0.88, 1.35) | 0.97 (0.88, 1.08) |
| Female | 0.17 (0.14, 0.21) | 0.21 (0.20, 0.23) | 0.63 (0.58, 0.69) | 0.20 (0.19, 0.21) | 0.22 (0.19, 0.26) | 0.19 (0.18, 0.21) | 0.34 (0.24, 0.46) | 0.29 (0.24, 0.34) |

**Notes:** aIncluded Canadian Network for Observational Drug Effect Studies (CNODES) data from British Columbia, Manitoba, and Ontario; the post-vaccine period included data from only British Columbia and Ontario. bIncluded data from Clinical Practice Research Datalink (CPRD) Aurum. cIncluded data from IQVIA Disease Analyzer Germany. dIncluded data from IQVIA Longitudinal Patient Data Italy. eNot provided due to small sample sizes (ie, ≤5 events for the Canadian data sources, <5 events for the European data sources).

**Panel B**

| **Characteristic** | **Netherlandsa** | | **Spainb** | | **United Statesc** | |
| --- | --- | --- | --- | --- | --- | --- |
| **Pre-Vaccine Availability** | **Post-Vaccine Availability** | **Pre-Vaccine Availability** | **Post-Vaccine Availability** | **Pre-Vaccine Availability** | **Post-Vaccine Availability** |
| **Arterial Thromboembolism** | | |  |  |  |  |
| **Age** |  |  |  |  |  |  |
| 18-44 years | 0.08 (0.05, 0.14) | 0.04 (0.02, 0.06) | 0.04 (0.03, 0.05) | 0.04 (0.03, 0.05) | 0.05 (0.03, 0.06) | 0.07 (0.06, 0.08) |
| 45-54 years | 0.35 (0.24, 0.49) | 0.20 (0.14, 0.27) | 0.20 (0.17, 0.24) | 0.20 (0.16, 0.25) | 0.28 (0.23, 0.34) | 0.36 (0.32, 0.39) |
| 55-64 years | 0.78 (0.60, 0.99) | 0.60 (0.49, 0.73) | 0.63 (0.56, 0.71) | 0.56 (0.48, 0.65) | 0.74 (0.66, 0.83) | 0.81 (0.76, 0.87) |
| 65-74 years | 1.40 (1.09, 1.77) | 1.23 (1.03, 1.46) | 1.30 (1.16, 1.46) | 1.57 (1.39, 1.77) | 1.60 (1.50, 1.70) | 1.51 (1.45, 1.57) |
| 75-84 years | 1.50 (1.11, 1.99) | 2.02 (1.67, 2.41) | 2.50 (2.27, 2.74) | 2.67 (2.37, 3.00) | 2.72 (2.55, 2.90) | 2.74 (2.64, 2.85) |
| ≥85 years | 1.48 (0.95, 2.19) | 2.02 (1.48, 2.68) | 2.32 (2.11, 2.56) | 2.74 (2.38, 3.14) | 3.27 (2.99, 3.58) | 3.69 (3.48, 3.91) |
| **Sex** |  |  |  |  |  |  |
| Male | 0.84 (0.72, 0.98) | 0.62 (0.55, 0.69) | 0.57 (0.53, 0.61) | 0.58 (0.53, 0.63) | 1.27 (1.21, 1.33) | 1.26 (1.22, 1.29) |
| Female | 0.35 (0.28, 0.43) | 0.27 (0.23, 0.31) | 0.48 (0.45, 0.51) | 0.43 (0.40, 0.48) | 0.81 (0.76, 0.85) | 0.86 (0.83, 0.89) |
| **Venous Thromboembolism** | | |  |  |  |  |
| **Age** |  |  |  |  |  |  |
| 18-44 years | 0.14 (0.09, 0.20) | 0.14 (0.11, 0.18) | 0.08 (0.07, 0.10) | 0.04 (0.03, 0.06) | 0.14 (0.11, 0.16) | 0.18 (0.16, 0.20) |
| 45-54 years | 0.38 (0.27, 0.53) | 0.38 (0.30, 0.48) | 0.26 (0.22, 0.30) | 0.21 (0.17, 0.26) | 0.42 (0.36, 0.49) | 0.61 (0.57, 0.66) |
| 55-64 years | 0.50 (0.36, 0.67) | 0.51 (0.41, 0.63) | 0.55 (0.49, 0.63) | 0.52 (0.44, 0.61) | 0.74 (0.66, 0.82) | 1.05 (0.99, 1.11) |
| 65-74 years | 0.85 (0.61, 1.15) | 0.63 (0.49, 0.80) | 1.14 (1.01, 1.29) | 1.08 (0.93, 1.24) | 1.32 (1.23, 1.42) | 1.54 (1.49, 1.60) |
| 75-84 years | 1.00 (0.69, 1.41) | 0.83 (0.62, 1.10) | 1.38 (1.21, 1.56) | 1.42 (1.20, 1.66) | 1.77 (1.63, 1.92) | 2.09 (2.00, 2.19) |
| ≥85 years | 0.86 (0.47, 1.44) | 0.26 (0.10, 0.57) | 0.65 (0.53, 0.78) | 1.19 (0.96, 1.47) | 1.66 (1.45, 1.88) | 2.37 (2.20, 2.55) |
| **Sex** |  |  |  |  |  |  |
| Male | 0.42 (0.33, 0.52) | 0.38 (0.33, 0.44) | 0.49 (0.46, 0.53) | 0.41 (0.37, 0.46) | 0.97 (0.91, 1.02) | 1.24 (1.20, 1.28) |
| Female | 0.41 (0.34, 0.50) | 0.30 (0.26, 0.35) | 0.27 (0.24, 0.29) | 0.27 (0.24, 0.31) | 0.67 (0.63, 0.71) | 0.84 (0.81, 0.86) |

**Notes:** aIncluded data from Integrated Primary Care Information (IPCI). bIncluded data from Information System for Research in Primary Care (SIDIAP) from Catalonia, Spain. cIncluded data from two national health insurers (Aetna; Humana, Inc.) and four regional integrated delivery systems (HealthPartners; Kaiser Permanente Colorado; Kaiser Permanente Northwest; Kaiser Permanente Washington) within the Food and Drug Administration Sentinel System; the post-vaccine availability period did not include Kaiser Permanente Washington.

**Supplemental Table 2.** 90-day absolute risk (%) with 95% confidence intervals of arterial and venous thromboembolism events among ambulatory-diagnosed patients with COVID-19 over time, by country

| **Month of COVID-19 Diagnosis** | **Canadaa** | **Englandb** | **Germanyc** | **Italyd** | **Netherlandse** | **Spainf** | **United Statesg** |
| --- | --- | --- | --- | --- | --- | --- | --- |
| **Arterial Thromboembolism** | | | | | | | |
| March 2020 | -- | 0.22 (0.15, 0.30) | 0.23 (0.15, 0.34) | 0.83 (0.48, 1.32) | 0.55 (0.37, 0.78) | 0.45 (0.40, 0.51) | -- |
| April 2020 | 0.26 (0.18, 0.37) | 0.32 (0.26, 0.38) | 0.43 (0.32, 0.57) | 0.96 (0.53, 1.60) | 0.59 (0.41, 0.83) | 0.95 (0.87, 1.04) | 1.49 (1.29, 1.70) |
| May 2020 | 0.22 (0.13, 0.35) | 0.40 (0.30, 0.52) | 0.60 (0.45, 0.79) | 0.97 (0.39, 1.99) | 1.22 (0.77, 1.82) | 0.58 (0.47, 0.70) | 1.09 (0.93, 1.26) |
| June 2020 | --h | 0.45 (0.31, 0.64) | 0.46 (0.31, 0.65) | --h | 0.66 (0.30, 1.25) | 0.37 (0.27, 0.51) | 0.92 (0.80, 1.05) |
| July 2020 | 0.20 (0.08, 0.42) | 0.53 (0.34, 0.78) | 0.38 (0.27, 0.53) | --h | 0.61 (0.26, 1.19) | 0.37 (0.29, 0.46) | 1.02 (0.92, 1.12) |
| August 2020 | --h | 0.37 (0.23, 0.56) | 0.21 (0.13, 0.31) | --h | 0.72 (0.36, 1.28) | 0.38 (0.30, 0.46) | 1.11 (0.99, 1.24) |
| September 2020 | 0.05 (0.02, 0.11) | 0.17 (0.11, 0.25) | 0.31 (0.23, 0.40) | --h | 0.69 (0.45, 1.00) | 0.40 (0.32, 0.49) | 0.94 (0.82, 1.07) |
| October 2020 | 0.07 (0.04, 0.12) | 0.24 (0.19, 0.31) | 0.31 (0.25, 0.39) | 0.26 (0.13, 0.47) | 0.48 (0.37, 0.61) | 0.39 (0.34, 0.44) | 1.02 (0.93, 1.12) |
| November 2020 | 0.09 (0.07, 0.12) | 0.27 (0.22, 0.33) | 0.36 (0.29, 0.43) | 0.52 (0.38, 0.70) | 0.45 (0.33, 0.59) | 0.52 (0.46, 0.60) | 0.93 (0.87, 1.00) |
| December 2020 | 0.11 (0.09, 0.14) | 0.24 (0.19, 0.29) | 0.40 (0.33, 0.48) | 0.28 (0.15, 0.48) | 0.65 (0.52, 0.79) | 0.52 (0.45, 0.60) | 1.06 (1.00, 1.13) |
| January 2021 | 0.15 (0.12, 0.18) | 0.22 (0.19, 0.25) | 0.55 (0.45, 0.65) | 0.43 (0.24, 0.73) | 0.63 (0.48, 0.80) | 0.65 (0.59, 0.71) | 1.12 (1.06, 1.19) |
| February 2021 | 0.14 (0.11, 0.19) | 0.26 (0.20, 0.34) | 0.39 (0.30, 0.51) | 0.85 (0.55, 1.24) | 0.74 (0.54, 1.00) | 0.59 (0.50, 0.69) | 1.14 (1.04, 1.24) |
| March 2021 | 0.14 (0.11, 0.18) | 0.41 (0.30, 0.56) | 0.36 (0.28, 0.45) | 0.55 (0.37, 0.79) | 0.48 (0.35, 0.65) | 0.51 (0.42, 0.61) | 0.87 (0.78, 0.97) |
| April 2021 | 0.14 (0.11, 0.16) | 0.36 (0.22, 0.54) | 0.44 (0.35, 0.54) | 0.55 (0.31, 0.89) | 0.39 (0.29, 0.52) | 0.47 (0.39, 0.56) | 0.96 (0.86, 1.07) |
| May 2021 | 0.12 (0.09, 0.16) | 0.19 (0.11, 0.32) | 0.46 (0.34, 0.60) | 0.54 (0.22, 1.10) | 0.51 (0.33, 0.76) | 0.23 (0.15, 0.32) | 1.13 (0.98, 1.30) |
| June 2021 | 0.11 (0.06, 0.20) | 0.04 (0.02, 0.07) | 0.48 (0.32, 0.69) | --h | --h | 0.06 (0.03, 0.11) | 1.05 (0.86, 1.26) |
| July 2021 | 0.15 (0.07, 0.30) | 0.03 (0.02, 0.05) | 0.20 (0.11, 0.36) | 0.66 (0.22, 1.54) | 0.15 (0.07, 0.28) | -- | 1.17 (1.06, 1.30) |
| August 2021 | 0.09 (0.06, 0.14) | 0.07 (0.05, 0.09) | 0.44 (0.30, 0.63) | 0.58 (0.21, 1.27) | 0.21 (0.07, 0.50) | -- | 1.16 (1.09, 1.23) |
| September 2021 | 0.06 (0.04, 0.10) | 0.06 (0.05, 0.09) | 0.36 (0.25, 0.49) | 1.04 (0.45, 2.04) | 0.68 (0.36, 1.17) | -- | 1.24 (1.15, 1.32) |
| October 2021 | 0.09 (0.05, 0.14) | 0.07 (0.06, 0.09) | 0.36 (0.26, 0.47) | 1.55 (0.74, 2.83) | 0.56 (0.35, 0.84) | -- | 1.02 (0.93, 1.12) |
| November 2021 | 0.12 (0.08, 0.18) | 0.05 (0.03, 0.06) | 0.37 (0.30, 0.43) | 0.32 (0.10, 0.75) | 0.37 (0.28, 0.46) | -- | 0.99 (0.90, 1.08) |
| December 2021 | 0.05 (0.04, 0.06) | 0.01 (0.00, 0.01) | 0.25 (0.19, 0.32) | 0.17 (0.09, 0.31) | 0.16 (0.10, 0.23) | -- | 0.76 (0.72, 0.81) |
| January 2022 | -- | --h | 0.25 (0.21, 0.30) | 0.23 (0.17, 0.32) | -- | -- | -- |
| February 2022 | -- | -- | 0.21 (0.17, 0.25) | 0.37 (0.23, 0.57) | -- | -- | -- |
| March 2022 | -- | -- | 0.21 (0.18, 0.25) | 0.19 (0.10, 0.32) | -- | -- | -- |
| April 2022 | -- | -- | 0.23 (0.19, 0.28) | 0.32 (0.20, 0.50) | -- | -- | -- |
| May 2022 | -- | -- | 0.32 (0.25, 0.41) | 0.33 (0.17, 0.58) | -- | -- | -- |
| June 2022 | -- | -- | 0.25 (0.20, 0.32) | 0.41 (0.25, 0.64) | -- | -- | -- |
| July 2022 | -- | -- | 0.27 (0.22, 0.33) | 0.34 (0.22, 0.50) | -- | -- | -- |
| August 2022 | -- | -- | 0.18 (0.13, 0.25) | 0.26 (0.10, 0.53) | -- | -- | -- |
| September 2022 | -- | -- | 0.12 (0.08, 0.18) | 0.31 (0.10, 0.73) | -- | -- | -- |
| **Venous Thromboembolism** | | | | | | | |
| March 2020 | -- | 0.81 (0.68, 0.96) | 0.20 (0.12, 0.31) | 0.93 (0.56, 1.44) | 0.45 (0.29, 0.67) | 0.60 (0.54, 0.66) | -- |
| April 2020 | 0.56 (0.44, 0.71) | 1.03 (0.93, 1.14) | 0.50 (0.38, 0.65) | 0.75 (0.38, 1.34) | 0.54 (0.36, 0.76) | 0.44 (0.39, 0.51) | 0.92 (0.77, 1.09) |
| May 2020 | 0.26 (0.16, 0.40) | 1.09 (0.93, 1.27) | 0.43 (0.30, 0.60) | 0.83 (0.31, 1.80) | 0.74 (0.41, 1.24) | 0.18 (0.12, 0.25) | 0.73 (0.60, 0.87) |
| June 2020 | 0.38 (0.22, 0.61) | 1.00 (0.79, 1.26) | 0.47 (0.32, 0.66) | --h | 0.73 (0.35, 1.34) | 0.18 (0.11, 0.28) | 0.68 (0.57, 0.79) |
| July 2020 | 0.38 (0.20, 0.64) | 0.77 (0.53, 1.06) | 0.27 (0.18, 0.40) | --h | --h | 0.19 (0.14, 0.26) | 0.78 (0.70, 0.88) |
| August 2020 | 0.14 (0.05, 0.29) | 0.63 (0.44, 0.86) | 0.19 (0.12, 0.29) | --h | --h | 0.22 (0.16, 0.29) | 0.93 (0.82, 1.05) |
| September 2020 | 0.11 (0.06, 0.19) | 0.38 (0.29, 0.49) | 0.28 (0.20, 0.37) | --h | 0.32 (0.16, 0.55) | 0.24 (0.18, 0.32) | 0.75 (0.65, 0.87) |
| October 2020 | 0.17 (0.12, 0.23) | 0.67 (0.58, 0.77) | 0.23 (0.17, 0.30) | 0.36 (0.20, 0.59) | 0.37 (0.27, 0.48) | 0.34 (0.29, 0.38) | 0.89 (0.80, 0.99) |
| November 2020 | 0.19 (0.16, 0.23) | 0.89 (0.79, 0.99) | 0.30 (0.24, 0.36) | 0.74 (0.57, 0.93) | 0.38 (0.28, 0.52) | 0.35 (0.29, 0.41) | 0.76 (0.70, 0.82) |
| December 2020 | 0.27 (0.23, 0.31) | 0.88 (0.80, 0.98) | 0.39 (0.32, 0.47) | 0.69 (0.47, 0.97) | 0.42 (0.32, 0.55) | 0.35 (0.29, 0.41) | 0.93 (0.88, 0.99) |
| January 2021 | 0.26 (0.22, 0.30) | 1.12 (1.05, 1.20) | 0.47 (0.38, 0.56) | 0.59 (0.35, 0.92) | 0.54 (0.40, 0.70) | 0.36 (0.32, 0.41) | 1.01 (0.95, 1.07) |
| February 2021 | 0.33 (0.27, 0.40) | 1.18 (1.04, 1.32) | 0.54 (0.43, 0.68) | 0.55 (0.32, 0.88) | 0.53 (0.36, 0.76) | 0.45 (0.37, 0.54) | 1.00 (0.90, 1.10) |
| March 2021 | 0.43 (0.38, 0.49) | 0.96 (0.78, 1.17) | 0.37 (0.30, 0.46) | 0.61 (0.42, 0.86) | 0.29 (0.20, 0.43) | 0.40 (0.32, 0.49) | 0.89 (0.80, 1.00) |
| April 2021 | 0.54 (0.49, 0.59) | 1.05 (0.81, 1.34) | 0.37 (0.29, 0.47) | 0.72 (0.45, 1.10) | 0.41 (0.31, 0.54) | 0.38 (0.31, 0.46) | 1.02 (0.91, 1.13) |
| May 2021 | 0.49 (0.43, 0.55) | 0.65 (0.48, 0.85) | 0.33 (0.24, 0.46) | 1.23 (0.70, 1.98) | 0.51 (0.33, 0.76) | 0.16 (0.10, 0.25) | 1.08 (0.94, 1.24) |
| June 2021 | 0.47 (0.35, 0.63) | 0.17 (0.13, 0.22) | 0.27 (0.16, 0.44) | --h | 0.63 (0.30, 1.16) | 0.06 (0.03, 0.11) | 1.34 (1.13, 1.58) |
| July 2021 | 0.37 (0.22, 0.57) | 0.17 (0.15, 0.20) | 0.17 (0.08, 0.31) | --h | 0.17 (0.08, 0.30) | -- | 1.23 (1.11, 1.36) |
| August 2021 | 0.35 (0.28, 0.43) | 0.19 (0.16, 0.22) | 0.28 (0.17, 0.44) | 0.58 (0.21, 1.27) | 0.47 (0.23, 0.84) | -- | 1.29 (1.21, 1.37) |
| September 2021 | 0.25 (0.19, 0.32) | 0.26 (0.22, 0.30) | 0.24 (0.16, 0.36) | --h | 0.42 (0.18, 0.83) | -- | 1.20 (1.12, 1.29) |
| October 2021 | 0.25 (0.19, 0.33) | 0.20 (0.17, 0.23) | 0.23 (0.15, 0.33) | --h | 0.25 (0.12, 0.47) | -- | 1.12 (1.02, 1.22) |
| November 2021 | 0.27 (0.20, 0.35) | 0.16 (0.13, 0.18) | 0.24 (0.19, 0.30) | 0.71 (0.35, 1.26) | 0.22 (0.15, 0.30) | -- | 1.10 (1.01, 1.20) |
| December 2021 | 0.09 (0.07, 0.10) | 0.04 (0.03, 0.04) | 0.30 (0.23, 0.37) | 0.40 (0.26, 0.59) | 0.15 (0.10, 0.23) | -- | 0.70 (0.66, 0.75) |
| January 2022 | -- | 0.00 (0.00, 0.01) | 0.25 (0.20, 0.30) | 0.41 (0.32, 0.52) | -- | -- | -- |
| February 2022 | -- | -- | 0.22 (0.19, 0.26) | 0.73 (0.52, 0.99) | -- | -- | -- |
| March 2022 | -- | -- | 0.28 (0.24, 0.32) | 0.55 (0.39, 0.76) | -- | -- | -- |
| April 2022 | -- | -- | 0.31 (0.26, 0.37) | 0.69 (0.50, 0.93) | -- | -- | -- |
| May 2022 | -- | -- | 0.27 (0.20, 0.35) | 0.77 (0.51, 1.11) | -- | -- | -- |
| June 2022 | -- | -- | 0.24 (0.19, 0.30) | 0.67 (0.46, 0.95) | -- | -- | -- |
| July 2022 | -- | -- | 0.31 (0.26, 0.37) | 0.64 (0.48, 0.85) | -- | -- | -- |
| August 2022 | -- | -- | 0.22 (0.16, 0.30) | 0.59 (0.34, 0.95) | -- | -- | -- |
| September 2022 | -- | -- | 0.07 (0.04, 0.11) | --h | -- | -- | -- |

**Notes:** aIncluded Canadian Network for Observational Drug Effect Studies (CNODES) data from British Columbia, Manitoba, and Ontario from April 2020 through November 2020. Included Canadian Network for Observational Drug Effect Studies (CNODES) data from British Columbia and Ontario from December 2020 through December 2021. bIncluded data from Clinical Practice Research Datalink (CPRD) Aurum. cIncluded data from IQVIA Disease Analyzer Germany. dIncluded data from IQVIA Longitudinal Patient Data Italy. eIncluded data from Integrated Primary Care Information (IPCI). fIncluded data from Information System for Research in Primary Care (SIDIAP) from Catalonia, Spain. gIncluded data from two national health insurers (Aetna; Humana, Inc.) and four regional integrated delivery systems (HealthPartners; Kaiser Permanente Colorado; Kaiser Permanente Northwest; Kaiser Permanente Washington) within the Food and Drug Administration Sentinel System from April 2020 through November 2020. Included data from two national health insurers (Aetna; Humana, Inc.) and three regional integrated delivery systems (HealthPartners; Kaiser Permanente Colorado; Kaiser Permanente Northwest) within the Food and Drug Administration Sentinel System from December 2020 through December 2021. hNot provided due to small sample sizes (ie, ≤5 events for the Canadian data sources, <5 events for the European data sources).

**Supplemental Table 3.** 30-day absolute risk of all-cause mortality following an arterial and venous thromboembolism event among ambulatory-diagnosed patients with COVID-19 prior to and during COVID-19 vaccine availability, by country and after summarization of results

|  | **Before COVID-19 Vaccine Availability** | | | **During COVID-19 Vaccine Availability** | | |
| --- | --- | --- | --- | --- | --- | --- |
|  | **No. with ATE/VTE Events** | **No. of Deaths After ATE/VTE Event** | **Absolute Risk (%) with 95% CI** | **No. with ATE/VTE Events** | **No. of Deaths After ATE/VTE Event** | **Absolute Risk (%) with 95% CI** |
| **Arterial Thromboembolism** |  |  |  |  |  |  |
| CNODES (Canada)a | 139 | 46 | 33.09 (25.35, 41.57) | 684 | 156 | 22.81 (19.71, 26.14) |
| Clinical Practice Research Datalink Aurum (England) | 477 | 11 | 2.31 (1.16, 4.09) | 725 | 34 | 4.69 (3.27, 6.49) |
| IQVIA Disease Analyzer (Germany) | --d | --d | --d | --d | --d | --d |
| IQVIA Longitudinal Patient Data (Italy) | 98 | --e | --e | 313 | --e | --e |
| Integrated Primary Care Information (Netherlands) | 254 | --e | --e | 459 | 10 | 2.18 (1.05, 3.97) |
| Information System for Research in Primary Care (Spain)b | 1,595 | 127 | 7.96 (6.68, 9.40) | 1,033 | 51 | 4.94 (3.70, 6.44) |
| FDA Sentinel (United States)c | 2,752 | 534 | 19.40 (17.94, 20.93) | 7,801 | 1,698 | 21.77 (20.85, 22.70) |
| **Venous Thromboembolism** |  |  |  |  |  |  |
| CNODES (Canada)a | 287 | 39 | 13.59 (9.84, 18.11) | 1,967 | 238 | 12.10 (10.69, 13.62) |
| Clinical Practice Research Datalink Aurum (England) | 1,371 | 16 | 1.17 (0.67, 1.89) | 2,837 | 48 | 1.69 (1.25, 2.24) |
| IQVIA Disease Analyzer (Germany) | --d | --d | --d | --d | --d | --d |
| IQVIA Longitudinal Patient Data (Italy) | 127 | --e | --e | 508 | --e | --e |
| Integrated Primary Care Information (Netherlands) | 190 | --e | --e | 361 | --e | --e |
| Information System for Research in Primary Care (Spain)b | 1,132 | 86 | 7.60 (6.12, 9.30) | 698 | 50 | 7.16 (5.36, 9.34) |
| FDA Sentinel (United States)c | 2,175 | 318 | 14.62 (13.16, 16.18) | 7,650 | 1,386 | 18.12 (17.26, 19.00) |

**Notes:** aIncluded data from British Columbia, Manitoba, and Ontario before COVID-19 vaccine availability and British Columbia and Ontario during COVID-19 vaccine availability. bIncluded data from Catalonia, Spain. cIncluded data from two national health insurers (Aetna; Humana, Inc.) and four regional integrated delivery systems (HealthPartners; Kaiser Permanente Colorado; Kaiser Permanente Northwest; Kaiser Permanente Washington) before COVID-19 vaccine availability. Included data from two national health insurers (Aetna; Humana, Inc.) and three regional integrated delivery systems (HealthPartners; Kaiser Permanente Colorado; Kaiser Permanente Northwest) during COVID-19 vaccine availability. dDeath data was not available from IQVIA Disease Analyzer (Germany). eNot provided due to small sample sizes (ie, <5 events for the European data sources).

**Abbreviations:** CI, confidence interval; CNODES, Canadian Network for Observational Drug Effect Studies; FDA, Food and Drug Administration

**Supplemental Table 4.** Characteristics of patients initially diagnosed with COVID-19 in the hospital setting prior to and during COVID-19 vaccine availability, by country

| **Characteristica** | **Canadab** | | **Spainc** | | **United Statesd** | |
| --- | --- | --- | --- | --- | --- | --- |
| **Pre-Vaccine Availability** | **Post-Vaccine Availability** | **Pre-Vaccine Availability** | **Post-Vaccine Availability** | **Pre-Vaccine Availability** | **Post-Vaccine Availability** |
| **Total patients** | 5,114 | 20,265 | 15,738 | 5,405 | 41,443 | 91,433 |
| **Age (years)** |  |  |  |  |  |  |
| Mean (SD) | 70.5 (17.1) | 67.7 (17.9) | 69.0 (17.5) | 71.0 (16.8) | 72.3 (13.1) | 71.7 (13.0) |
| 18-44 years | 469 (9.2%) | 2,661 (13.1%) | 1,855 (11.8%) | 458 (8.5%) | 2,032 (4.9%) | 4,728 (5.2%) |
| 45-54 years | 445 (8.7%) | 1,921 (9.5%) | 1,458 (9.3%) | 472 (8.7%) | 2,186 (5.3%) | 4,836 (5.3%) |
| 55-64 years | 787 (15.4%) | 3,273 (16.2%) | 2,239 (14.2%) | 756 (14.0%) | 5,161 (12.5%) | 11,828 (12.9%) |
| 65-74 years | 1,075 (21.0%) | 4,337 (21.4%) | 3,192 (20.3%) | 1,083 (20.0%) | 12,889 (31.1%) | 29,868 (32.7%) |
| 75-84 years | 1,186 (23.2%) | 4,481 (22.1%) | 3,907 (24.8%) | 1,419 (26.3%) | 12,649 (30.5%) | 27,382 (29.9%) |
| ≥85 years | 1,152 (22.5%) | 3,592 (17.7%) | 3,087 (19.6%) | 1,217 (22.5%) | 6,526 (15.7%) | 12,791 (14.0%) |
| **Female sex** | 2,352 (46.0%) | 9,219 (45.5%) | 7,077 (45.0%) | 2,415 (44.7%) | 20,553 (49.6%) | 46,086 (50.4%) |
| **Month of COVID-19 diagnosis** |  |  |  |  |  |  |
| March 2020 | -- | -- | 6,087 (38.7%) | -- | -- | -- |
| April 2020 | 1,263 (24.7%) | -- | 3,925 (24.9%) | -- | 5,676 (13.7%) | -- |
| May 2020 | 586 (11.5%) | -- | 601 (3.8%) | -- | 2,960 (7.1%) | -- |
| June 2020 | 207 (4.0%) | -- | 218 (1.4%) | -- | 3,052 (7.4%) | -- |
| July 2020 | 130 (2.5%) | -- | 480 (3.0%) | -- | 6,193 (14.9%) | -- |
| August 2020 | 126 (2.5%) | -- | 612 (3.9%) | -- | 4,110 (9.9%) | -- |
| September 2020 | 339 (6.6%) | -- | 635 (4.0%) | -- | 3,130 (7.6%) | -- |
| October 2020 | 810 (15.8%) | -- | 1,719 (10.9%) | -- | 5,449 (13.1%) | -- |
| November 2020 | 1,653 (32.3%) | -- | 1,461 (9.3%) | -- | 10,873 (26.2%) | -- |
| December 2020 | -- | 2,302 (11.4%) | -- | 1,420 (26.3%) | -- | 13,703 (15.0%) |
| January 2021 | -- | 2,327 (11.5%) | -- | 1,775 (32.8%) | -- | 13,466 (14.7%) |
| February 2021 | -- | 1,299 (6.4%) | -- | 740 (13.7%) | -- | 6,020 (6.6%) |
| March 2021 | -- | 1,649 (8.1%) | -- | 567 (10.5%) | -- | 4,291 (4.7%) |
| April 2021 | -- | 3,051 (15.1%) | -- | 585 (10.8%) | -- | 4,423 (4.8%) |
| May 2021 | -- | 1,800 (8.9%) | -- | 222 (4.1%) | -- | 2,795 (3.1%) |
| June 2021 | -- | 597 (2.9%) | -- | 96 (1.8%) | -- | 1,627 (1.8%) |
| July 2021 | -- | 270 (1.3%) | -- | -- | -- | 3,983 (4.4%) |
| August 2021 | -- | 632 (3.1%) | -- | -- | -- | 10,134 (11.1%) |
| September 2021 | -- | 1,008 (5.0%) | -- | -- | -- | 8,491 (9.3%) |
| October 2021 | -- | 1,071 (5.3%) | -- | -- | -- | 5,619 (6.1%) |
| November 2021 | -- | 1,116 (5.5%) | -- | -- | -- | 5,939 (6.5%) |
| December 2021 | -- | 3,143 (15.5%) | -- | -- | -- | 10,942 (12.0%) |
| January 2022 | -- | -- | -- | -- | -- | -- |
| February 2022 | -- | -- | -- | -- | -- | -- |
| March 2022 | -- | -- | -- | -- | -- | -- |
| April 2022 | -- | -- | -- | -- | -- | -- |
| May 2022 | -- | -- | -- | -- | -- | -- |
| June 2022 | -- | -- | -- | -- | -- | -- |
| July 2022 | -- | -- | -- | -- | -- | -- |
| August 2022 | -- | -- | -- | -- | -- | -- |
| September 2022 | -- | -- | -- | -- | -- | -- |
| **Recent Encounters (mean, SD)**e |  |  |  |  |  |  |
| Number of Hospital Encounters | 0.7 (1.4) | 0.6 (1.3) | 7.0 (17.0) | 10.0 (20.4) | 0.7 (1.3) | 0.6 (1.2) |
| Number of Ambulatory Encounters | 16.3 (16.2) | 16.3 (17.8) | 21.0 (21.2) | 24.0 (24.3) | 8.4 (18.3) | 23.7 (30.6) |
| **Recent Diagnosis History**f |  |  |  |  |  |  |
| Atrial Fibrillation/Flutter | 1,250 (24.4%) | 4,718 (23.3%) | 2,778 (17.7%) | 1,194 (22.1%) | 12,435 (30.0%) | 27,229 (29.8%) |
| Cancer | 1,645 (32.2%) | 6,336 (31.3%) | 3,669 (23.3%) | 1,483 (27.4%) | 10,982 (26.5%) | 23,641 (25.9%) |
| Cardiovascular Disease (prior) | 1,847 (36.1%) | 6,772 (33.4%) | 11,607 (73.8%) | 4,272 (79.0%) | 23,325 (56.3%) | 48,877 (53.5%) |
| Chronic Kidney Disease | 1,066 (20.8%) | 3,850 (19.0%) | 3,785 (24.1%) | 1,553 (28.7%) | 21,151 (51.0%) | 43,396 (47.5%) |
| Chronic Obstructive Pulmonary Disease | 712 (13.9%) | 2,609 (12.9%) | 2,374 (15.1%) | 962 (17.8%) | 15,012 (36.2%) | 33,152 (36.3%) |
| Diabetes Mellitus (any type) | 2,287 (44.7%) | 8,248 (40.7%) | 4,450 (28.3%) | 1,798 (33.3%) | 21,775 (52.5%) | 45,763 (50.1%) |
| Heart Failure | 1,057 (20.7%) | 3,947 (19.5%) | 2,549 (16.2%) | 1,181 (21.9%) | 15,560 (37.5%) | 32,956 (36.0%) |
| Hyperlipidemia | 692 (13.5%) | 2,949 (14.6%) | 6,268 (39.8%) | 2,412 (44.6%) | 31,740 (76.6%) | 68,324 (74.7%) |
| Hypertension | 2,957 (57.8%) | 10,855 (53.6%) | 8,325 (52.9%) | 3,200 (59.2%) | 36,220 (87.4%) | 77,953 (85.3%) |
| Neurological Disease | 1,316 (25.7%) | 3,727 (18.4%) | 1,465 (9.3%) | 431 (8.0%) | 8,941 (21.6%) | 15,746 (17.2%) |
| Venous Thromboembolism (prior) | 292 (5.7%) | 1,054 (5.2%) | 552 (3.5%) | 245 (4.5%) | 3,275 (7.9%) | 6,464 (7.1%) |
| **Recent Dispensed Fills**g |  |  |  |  |  |  |
| Anticoagulant History | 828 (16.2%) | 2,946 (14.5%) | 1,407 (8.9%) | 648 (12.0%) | 8,841 (21.3%) | 19,584 (21.4%) |
| Antiplatelet History | 471 (9.2%) | 1,446 (7.1%) | 2,526 (16.1%) | 1,056 (19.5%) | 5,117 (12.3%) | 10,880 (11.9%) |

**Notes:** aData presented as n (%)unless otherwise specified. bIncluded Canadian Network for Observational Drug Effect Studies (CNODES) data from British Columbia, Manitoba, and Ontario prior to COVID-19 vaccine availability and British Columbia and Ontario during COVID-19 vaccine availability. cIncluded data from Information System for Research in Primary Care (SIDIAP) from Catalonia, Spain. dIncluded data from two national health insurers (Aetna; Humana, Inc.) and four regional integrated delivery systems (HealthPartners; Kaiser Permanente Colorado; Kaiser Permanente Northwest; Kaiser Permanente Washington) within the Food and Drug Administration Sentinel System prior to COVID-19 vaccine availability. Included data from two national health insurers (Aetna; Humana, Inc.) and three regional integrated delivery systems (HealthPartners; Kaiser Permanente Colorado; Kaiser Permanente Northwest) during COVID-19 vaccine availability. eRecent encounters assessed in the prior 365 days across all data sources. fRecent diagnosis history assessed in the prior 365 days in the US data sources, the prior 2 years for the Canadian data sources, and ever for the European data sources. gRecent dispensed fills assessed in the 183 to 3 days prior to COVID-19 diagnosis.

**Abbreviations:** SD, standard deviation

**Supplemental Table 5.** 90-day absolute risk of arterial and venous thromboembolism events among hospital-diagnosed patients with COVID-19 over time, by country

|  | **Before COVID-19 Vaccine Availability** | | | **During COVID-19 Vaccine Availability** | | |
| --- | --- | --- | --- | --- | --- | --- |
|  | **No. in Cohort** | **No. of Events** | **Absolute Risk (%) with 95% CI** | **No. in Cohort** | **No. of Events** | **Absolute Risk (%) with 95% CI** |
| **Arterial Thromboembolism** |  |  |  |  |  |  |
| CNODES (Canada)a | 5,114 | 254 | 4.97 (4.39, 5.60) | 20,265 | 1,002 | 4.94 (4.65, 5.25) |
| Information System for Research in Primary Care (Spain)b | 15,738 | 539 | 3.42 (3.15, 3.72) | 5,405 | 212 | 3.92 (3.42, 4.47) |
| FDA Sentinel (United States)c | 41,443 | 6,559 | 15.83 (15.48, 16.18) | 91,433 | 14,966 | 16.37 (16.13, 16.61) |
| **Venous Thromboembolism** |  |  |  |  |  |  |
| CNODES (Canada)a | 5,114 | 271 | 5.30 (4.70, 5.95) | 20,265 | 1,274 | 6.29 (5.96, 6.63) |
| Information System for Research in Primary Care (Spain)b | 15,738 | 525 | 3.34 (3.06, 3.63) | 5,405 | 218 | 4.03 (3.52, 4.59) |
| FDA Sentinel (United States)c | 41,443 | 3,984 | 9.61 (9.33, 9.90) | 91,433 | 10,366 | 11.34 (11.13, 11.54) |

**Notes:** aIncluded data from British Columbia, Manitoba, and Ontario before COVID-19 vaccine availability and British Columbia and Ontario during COVID-19 vaccine availability. bIncluded data from Catalonia, Spain. cIncluded data from two national health insurers (Aetna; Humana, Inc.) and four regional integrated delivery systems (HealthPartners; Kaiser Permanente Colorado; Kaiser Permanente Northwest; Kaiser Permanente Washington) before COVID-19 vaccine availability. Included data from two national health insurers (Aetna; Humana, Inc.) and three regional integrated delivery systems (HealthPartners; Kaiser Permanente Colorado; Kaiser Permanente Northwest) during COVID-19 vaccine availability.

**Abbreviations:** CI, confidence interval; CNODES, Canadian Network for Observational Drug Effect Studies; FDA, Food and Drug Administration; SD, standard deviation

**Supplemental Table 6.** 90-day absolute risk (%) with 95% confidence intervals of arterial and venous thromboembolism events among hospital-diagnosed patients with COVID-19 prior to and during COVID-19 vaccine availability by country

|  | **Canadaa** | | **Spainb** | | **United Statesc** | |
| --- | --- | --- | --- | --- | --- | --- |
| **Characteristic** | **Pre-Vaccine Availability** | **Post-Vaccine Availability** | **Pre-Vaccine Availability** | **Post-Vaccine Availability** | **Pre-Vaccine Availability** | **Post-Vaccine Availability** |
| **Arterial Thromboembolism** | | |  |  |  |  |
| **Age** |  |  |  |  |  |  |
| 18-44 years | 1.71 (0.74, 3.33) | 1.20 (0.82, 1.69) | 0.81 (0.45, 1.33) | --d | 3.44 (2.70, 4.33) | 2.94 (2.48, 3.46) |
| 45-54 years | 4.49 (2.77, 6.86) | 2.86 (2.16, 3.71) | 2.95 (2.14, 3.95) | 2.33 (1.17, 4.13) | 9.01 (7.84, 10.29) | 9.18 (8.38, 10.03) |
| 55-64 years | 5.08 (3.66, 6.86) | 5.10 (4.37, 5.91) | 2.59 (1.97, 3.34) | 2.91 (1.83, 4.37) | 12.90 (12.00, 13.85) | 13.70 (13.08, 14.33) |
| 65-74 years | 5.49 (4.20, 7.02) | 5.90 (5.22, 6.65) | 3.57 (2.95, 4.27) | 4.62 (3.45, 6.04) | 16.18 (15.55, 16.83) | 16.42 (16.00, 16.84) |
| 75-84 years | 5.90 (4.63, 7.40) | 6.03 (5.35, 6.76) | 4.53 (3.90, 5.23) | 3.95 (2.99, 5.09) | 18.33 (17.66, 19.02) | 19.28 (18.81, 19.75) |
| ≥85 years | 4.95 (3.77, 6.36) | 6.18 (5.41, 7.02) | 4.28 (3.59, 5.05) | 5.83 (4.58, 7.30) | 18.71 (17.77, 19.68) | 20.17 (19.48, 20.88) |
| **Sex** |  |  |  |  |  |  |
| Male | 5.76 (4.92, 6.69) | 5.87 (5.44, 6.32) | 3.66 (3.27, 4.08) | 4.08 (3.40, 4.85) | 17.14 (16.63, 17.66) | 18.00 (17.65, 18.36) |
| Female | 4.04 (3.28, 4.92) | 3.84 (3.46, 4.25) | 3.14 (2.74, 3.57) | 3.73 (3.01, 4.56) | 14.49 (14.02, 14.98) | 14.76 (14.44, 15.09) |
| **Venous Thromboembolism** | | |  |  |  |  |
| **Age** |  |  |  |  |  |  |
| 18-44 years | 6.82 (4.71, 9.50) | 5.37 (4.55, 6.30) | 1.67 (1.14, 2.36) | --d | 5.12 (4.20, 6.17) | 5.99 (5.33, 6.70) |
| 45-54 years | 6.07 (4.04, 8.71) | 8.64 (7.42, 9.99) | 3.16 (2.32, 4.19) | 5.08 (3.28, 7.47) | 8.46 (7.33, 9.71) | 11.17 (10.29, 12.09) |
| 55-64 years | 8.01 (6.21, 10.13) | 8.13 (7.21, 9.12) | 4.56 (3.73, 5.50) | 5.69 (4.15, 7.59) | 10.40 (9.58, 11.27) | 11.75 (11.18, 12.35) |
| 65-74 years | 5.77 (4.45, 7.33) | 7.52 (6.75, 8.34) | 4.98 (4.25, 5.79) | 5.63 (4.34, 7.18) | 10.21 (9.69, 10.75) | 12.31 (11.94, 12.69) |
| 75-84 years | 5.31 (4.11, 6.75) | 5.40 (4.76, 6.10) | 3.48 (2.93, 4.10) | 3.59 (2.69, 4.70) | 9.98 (9.46, 10.51) | 11.83 (11.45, 12.21) |
| ≥85 years | 2.08 (1.34, 3.08) | 3.65 (3.06, 4.31) | 1.65 (1.23, 2.17) | 2.96 (2.08, 4.07) | 8.89 (8.21, 9.60) | 9.69 (9.18, 10.21) |
| **Sex** |  |  |  |  |  |  |
| Male | 6.01 (5.15, 6.96) | 7.01 (6.54, 7.50) | 3.87 (3.47, 4.30) | 4.68 (3.95, 5.50) | 9.88 (9.48, 10.29) | 12.02 (11.72, 12.32) |
| Female | 4.46 (3.67, 5.38) | 5.42 (4.97, 5.91) | 2.68 (2.32, 3.09) | 3.23 (2.56, 4.01) | 9.34 (8.95, 9.75) | 10.67 (10.39, 10.95) |

**Notes:** aIncluded Canadian Network for Observational Drug Effect Studies (CNODES) data from British Columbia, Manitoba, and Ontario before COVID-19 vaccine availability and British Columbia and Ontario during COVID-19 vaccine availability. bIncluded data from Information System for Research in Primary Care (SIDIAP) from Catalonia, Spain. cIncluded data from two national health insurers (Aetna; Humana, Inc.) and four regional integrated delivery systems (HealthPartners; Kaiser Permanente Colorado; Kaiser Permanente Northwest; Kaiser Permanente Washington) within the Food and Drug Administration Sentinel System before COVID-19 vaccine availability. Included data from two national health insurers (Aetna; Humana, Inc.) and three regional integrated delivery systems (HealthPartners; Kaiser Permanente Colorado; Kaiser Permanente Northwest) within the Food and Drug Administration Sentinel System during COVID-19 vaccine availability. dNot provided due to small sample sizes (ie, <5 events for the European data sources).

**Supplemental Table 7**. 90-day absolute risk (%) with 95% confidence intervals of arterial and venous thromboembolism events among hospital-diagnosed patients with COVID-19 over time, by country

| **Month of COVID-19 Diagnosis** | **Canadaa** | **Spainb** | **United Statesc** |
| --- | --- | --- | --- |
| **Arterial Thromboembolism** |  |  |  |
| March 2020 | -- | 2.86 (2.45, 3.31) | -- |
| April 2020 | 4.43 (3.37, 5.72) | 3.62 (3.06, 4.25) | 16.03 (15.09, 17.01) |
| May 2020 | 4.27 (2.78, 6.23) | 3.83 (2.44, 5.69) | 17.53 (16.18, 18.95) |
| June 2020 | 4.83 (2.34, 8.70) | 2.75 (1.02, 5.89) | 17.07 (15.75, 18.45) |
| July 2020 | 5.38 (2.19, 10.78) | 3.75 (2.24, 5.86) | 15.73 (14.83, 16.66) |
| August 2020 | 9.52 (5.02, 16.05) | 3.76 (2.40, 5.59) | 15.38 (14.29, 16.52) |
| September 2020 | 5.31 (3.18, 8.26) | 4.25 (2.82, 6.13) | 16.90 (15.60, 18.26) |
| October 2020 | 5.06 (3.66, 6.80) | 4.30 (3.40, 5.37) | 14.83 (13.89, 15.80) |
| November 2020 | 5.14 (4.13, 6.32) | 3.56 (2.67, 4.64) | 15.32 (14.65, 16.01) |
| December 2020 | 6.30 (5.34, 7.37) | 5.99 (4.81, 7.35) | 16.41 (15.79, 17.04) |
| January 2021 | 5.67 (4.77, 6.69) | 3.94 (3.09, 4.96) | 16.83 (16.21, 17.48) |
| February 2021 | 5.47 (4.29, 6.84) | 2.70 (1.66, 4.14) | 16.76 (15.83, 17.73) |
| March 2021 | 5.28 (4.25, 6.47) | 2.47 (1.36, 4.11) | 16.83 (15.72, 17.98) |
| April 2021 | 4.10 (3.42, 4.86) | 2.74 (1.57, 4.40) | 15.17 (14.13, 16.26) |
| May 2021 | 4.72 (3.79, 5.81) | 2.25 (0.74, 5.18) | 15.78 (14.45, 17.18) |
| June 2021 | 6.03 (4.26, 8.25) | --d | 17.52 (15.70, 19.45) |
| July 2021 | 4.07 (2.05, 7.17) | 3.97 (2.58, 5.80) | 15.84 (14.72, 17.01) |
| August 2021 | 2.69 (1.57, 4.27) | -- | 15.98 (15.27, 16.70) |
| September 2021 | 2.28 (1.45, 3.40) | -- | 16.03 (15.25, 16.83) |
| October 2021 | 2.15 (1.37, 3.20) | -- | 16.37 (15.41, 17.37) |
| November 2021 | 4.75 (3.58, 6.17) | -- | 15.86 (14.94, 16.82) |
| December 2021 | 6.17 (5.36, 7.07) | -- | 16.91 (16.21, 17.62) |
| January 2022 | -- | -- | -- |
| February 2022 | -- | -- | -- |
| March 2022 | -- | -- | -- |
| April 2022 | -- | -- | -- |
| May 2022 | -- | -- | -- |
| June 2022 | -- | -- | -- |
| July 2022 | -- | -- | -- |
| August 2022 | -- | -- | -- |
| September 2022 | -- | -- | -- |
| **Venous Thromboembolism** |  |  |  |
| March 2020 | -- | 2.92 (2.52, 3.38) | -- |
| April 2020 | 5.15 (3.99, 6.51) | 4.25 (3.64, 4.93) | 8.93 (8.20, 9.70) |
| May 2020 | 4.95 (3.34, 7.03) | 3.99 (2.58, 5.88) | 9.76 (8.72, 10.89) |
| June 2020 | 8.21 (4.86, 12.82) | 3.21 (1.30, 6.50) | 9.80 (8.76, 10.91) |
| July 2020 | --d | 3.33 (1.92, 5.36) | 9.22 (8.51, 9.97) |
| August 2020 | --d | 3.27 (2.01, 5.00) | 10.75 (9.82, 11.74) |
| September 2020 | 9.14 (6.30, 12.73) | 3.31 (2.06, 5.01) | 9.11 (8.12, 10.17) |
| October 2020 | 5.31 (3.87, 7.08) | 3.20 (2.42, 4.14) | 9.73 (8.95, 10.54) |
| November 2020 | 4.60 (3.64, 5.72) | 2.53 (1.79, 3.47) | 9.76 (9.21, 10.33) |
| December 2020 | 5.08 (4.22, 6.06) | 3.87 (2.93, 5.01) | 10.49 (9.99, 11.02) |
| January 2021 | 6.49 (5.52, 7.57) | 4.11 (3.24, 5.14) | 11.49 (10.95, 12.04) |
| February 2021 | 5.85 (4.64, 7.27) | 3.92 (2.64, 5.58) | 11.31 (10.52, 12.14) |
| March 2021 | 6.12 (5.02, 7.39) | 5.47 (3.74, 7.67) | 11.12 (10.19, 12.10) |
| April 2021 | 8.72 (7.74, 9.78) | 3.25 (1.97, 5.03) | 11.37 (10.45, 12.34) |
| May 2021 | 6.94 (5.81, 8.22) | 4.05 (1.87, 7.56) | 10.88 (9.75, 12.09) |
| June 2021 | 6.20 (4.40, 8.44) | --d | 11.19 (9.70, 12.82) |
| July 2021 | 5.93 (3.42, 9.45) | -- | 10.24 (9.32, 11.23) |
| August 2021 | 7.12 (5.24, 9.41) | -- | 11.24 (10.63, 11.87) |
| September 2021 | 5.65 (4.31, 7.26) | -- | 11.74 (11.06, 12.45) |
| October 2021 | 4.86 (3.65, 6.32) | -- | 11.73 (10.90, 12.60) |
| November 2021 | 6.09 (4.76, 7.66) | -- | 12.34 (11.52, 13.21) |
| December 2021 | 5.19 (4.44, 6.02) | -- | 11.86 (11.26, 12.48) |
| January 2022 | -- | -- | -- |
| February 2022 | -- | -- | -- |
| March 2022 | -- | -- | -- |
| April 2022 | -- | -- | -- |
| May 2022 | -- | -- | -- |
| June 2022 | -- | -- | -- |
| July 2022 | -- | -- | -- |
| August 2022 | -- | -- | -- |
| September 2022 | -- | -- | -- |

**Notes:** aIncluded Canadian Network for Observational Drug Effect Studies (CNODES) data from British Columbia, Manitoba, and Ontario from April 2020 through November 2020. Included Canadian Network for Observational Drug Effect Studies (CNODES) data from British Columbia and Ontario from December 2020 through December 2021. bIncluded data from Information System for Research in Primary Care (SIDIAP) from Catalonia, Spain. cIncluded data from two national health insurers (Aetna; Humana, Inc.) and four regional integrated delivery systems (HealthPartners; Kaiser Permanente Colorado; Kaiser Permanente Northwest; Kaiser Permanente Washington) within the Food and Drug Administration Sentinel System from April 2020 through November 2020. Included data from two national health insurers (Aetna; Humana, Inc.) and three regional integrated delivery systems (HealthPartners; Kaiser Permanente Colorado; Kaiser Permanente Northwest) within the Food and Drug Administration Sentinel System from December 2020 through December 2021. dNot provided due to small sample sizes (ie, ≤5 events for the Canadian data sources, <5 events for the European data sources).

**Supplemental Table 8.** 30-day absolute risk of all-cause mortality following an arterial and venous thromboembolism event among hospital-diagnosed patients with COVID-19 prior to and during COVID-19 vaccine availability, by country and after summarization of results

|  | **Before COVID-19 Vaccine Availability** | | | **During COVID-19 Vaccine Availability** | | |
| --- | --- | --- | --- | --- | --- | --- |
|  | **No. with ATE/VTE Events** | **No. of Deaths After ATE/EVT Event** | **Absolute Risk (%) with 95% CI** | **No. with ATE/VTE Events** | **No. of Deaths After ATE/EVT Event** | **Absolute Risk (%) with 95% CI** |
| **Arterial Thromboembolism** |  |  |  |  |  |  |
| CNODES (Canada)a | 254 | 67 | 26.38 (21.07, 32.25) | 1,002 | 248 | 24.75 (22.11, 27.54) |
| Information System for Research in Primary Care (Spain)b | 539 | 87 | 16.14 (13.13, 19.52) | 212 | 40 | 18.87 (13.83, 24.79) |
| FDA Sentinel (United States)c | 6,559 | 1,482 | 22.59 (21.59, 23.63) | 14,966 | 3,517 | 23.50 (22.82, 24.19) |
| **Venous Thromboembolism** |  |  |  |  |  |  |
| CNODES (Canada)a | 271 | 39 | 14.39 (10.44, 19.14) | 1,274 | 253 | 19.86 (17.70, 22.16) |
| Information System for Research in Primary Care (Spain)b | 525 | 49 | 9.33 (6.98, 12.15) | 218 | 32 | 14.68 (10.26, 20.09) |
| FDA Sentinel (United States)c | 3,984 | 715 | 17.95 (16.77, 19.17) | 10,366 | 2,293 | 22.12 (21.32, 22.93) |

**Notes:** aIncluded data from British Columbia, Manitoba, and Ontario before COVID-19 vaccine availability and British Columbia and Ontario during COVID-19 vaccine availability. bIncluded data from Catalonia, Spain. cIncluded data from two national health insurers (Aetna; Humana, Inc.) and four regional integrated delivery systems (HealthPartners; Kaiser Permanente Colorado; Kaiser Permanente Northwest; Kaiser Permanente Washington) before COVID-19 vaccine availability. Included data from two national health insurers (Aetna; Humana, Inc.) and three regional integrated delivery systems (HealthPartners; Kaiser Permanente Colorado; Kaiser Permanente Northwest) during COVID-19 vaccine availability.

**Abbreviations:** CI, confidence interval; CNODES, Canadian Network for Observational Drug Effect Studies; FDA, Food and Drug Administration

**Supplemental Figure 1**. Country-level estimates (95% confidence intervals) of 90-day absolute risk of arterial (red) and venous (blue) thromboembolism events among patients initially diagnosed with COVID-19 in the hospital, by month of diagnosis across the pre- and post- vaccine availability periods


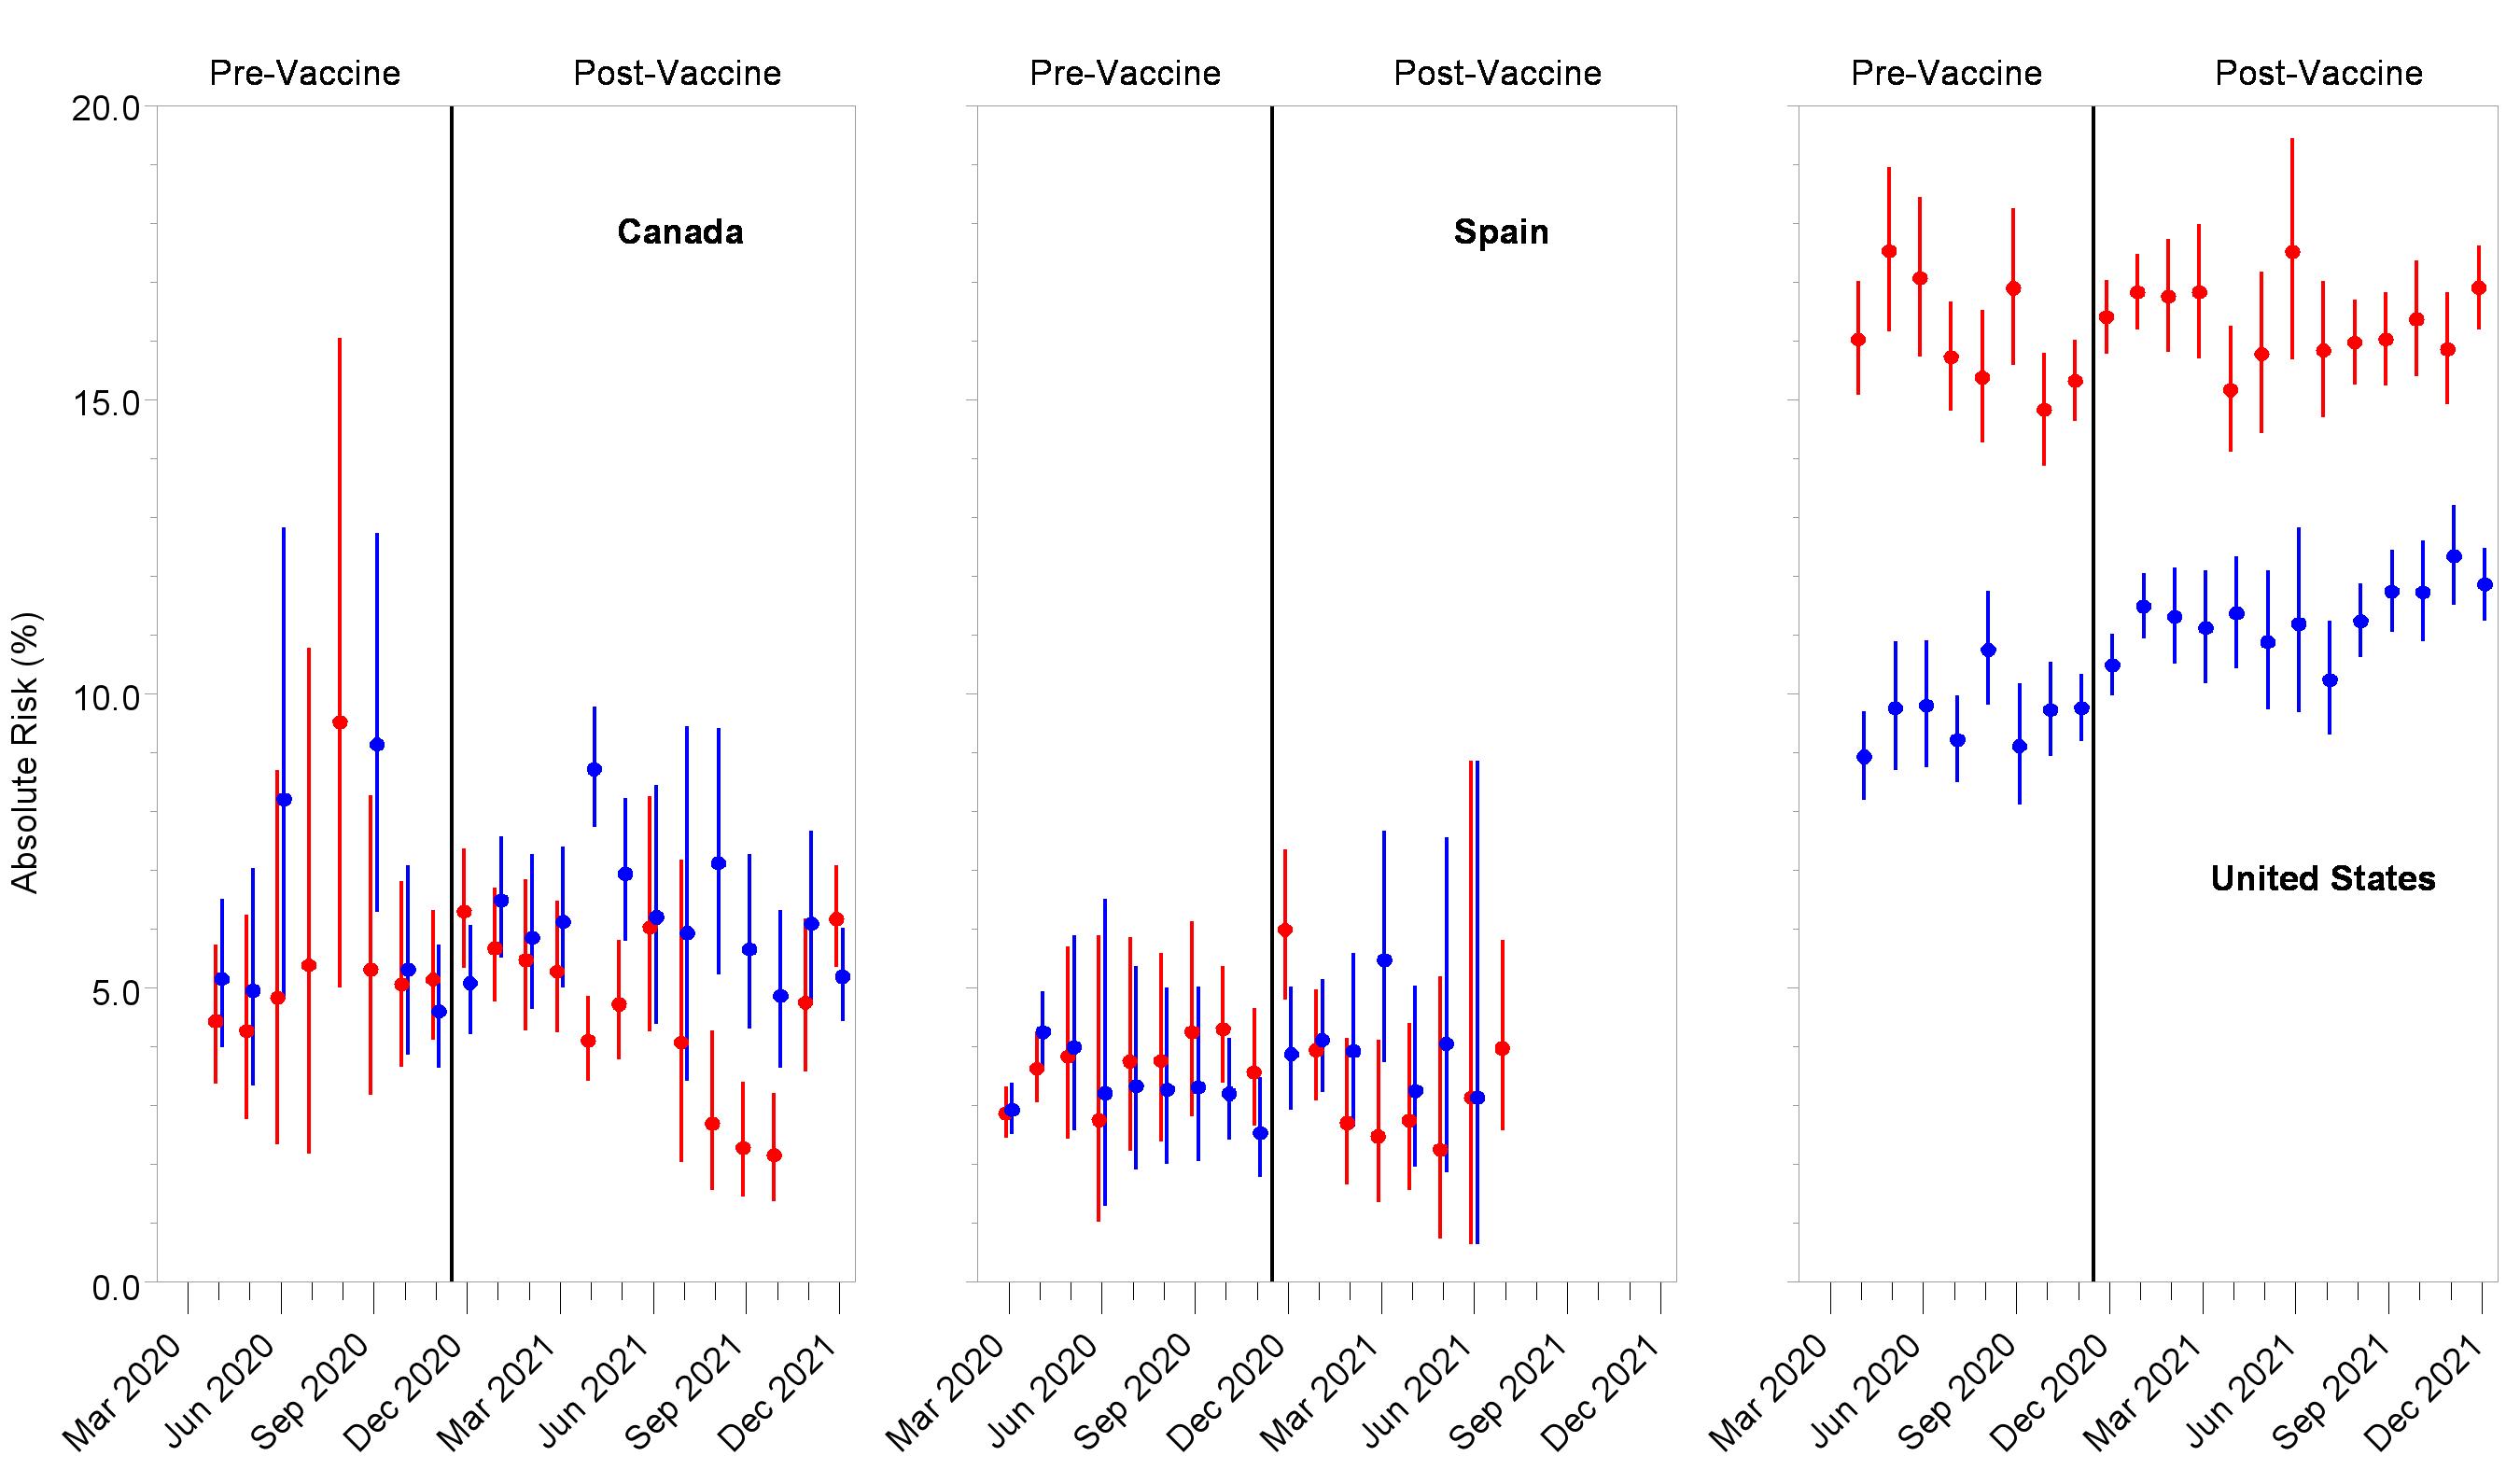

Supplement: Supplementary file 1 [file get_supplementary_file.php]
